# Supplementary material for: A dual-functional 2D coordination polymer exhibiting photomechanical and electrically conductive behaviours
Source: Royal Society of Chemistry journal article supplement (doi:10.1039/d3dt02728g), 2023-01-01
Supplement: d3dt02728g1.pdf [file d3dt02728g1.pdf]

# A dual-functional 2D coordination polymer exhibiting photomechanical and electrically conductive behaviours

Samim Khan,<sup>a</sup> Pubali Das,<sup>b</sup> Sanobar Naaz,<sup>a</sup> Paula Brandão,<sup>c</sup> Aditya Choudhury,<sup>d</sup> Raghavender Medishetty,<sup>\*d</sup> Partha Pratim Ray<sup>\*b</sup> and Mohammad Hedayetullah Mir<sup>\*a</sup>

<sup>a</sup>Department of Chemistry, Aliah University, New Town, Kolkata 700 160, India.

<sup>b</sup>Department of Physics, Jadavpur University, Jadavpur, Kolkata 700 032, India.

<sup>c</sup>Department of Chemistry, CICECO-Aveiro Institute of Materials, University of Aveiro, 3810-193 Aveiro, Portugal.

<sup>d</sup>Department of Chemistry, IIT Bhilai, Sejbahar, Raipur, Chhattisgarh 492015, India.

To whom correspondence should be addressed. E-mail: [raghavender@iitbhilai.ac.in](mailto:raghavender@iitbhilai.ac.in); [partha@phys.jdvu.ac.in](mailto:partha@phys.jdvu.ac.in) and [chmmir@gmail.com](mailto:chmmir@gmail.com)

## Supporting Information

**Table S1.** Crystal data and refinement parameters for compound **1**

|                                                                                   |                                                                                            |
|-----------------------------------------------------------------------------------|--------------------------------------------------------------------------------------------|
| Formula                                                                           | C <sub>42</sub> H <sub>26</sub> N <sub>2</sub> O <sub>8</sub> Zn <sub>2</sub> ( <b>1</b> ) |
| fw                                                                                | 817.43                                                                                     |
| cryst syst                                                                        | Triclinic                                                                                  |
| space group                                                                       | <i>P</i> $\bar{1}$                                                                         |
| <i>a</i> (Å)                                                                      | 10.1102(10)                                                                                |
| <i>b</i> (Å)                                                                      | 12.4476(11)                                                                                |
| <i>c</i> (Å)                                                                      | 15.9753(16)                                                                                |
| $\alpha$ (deg)                                                                    | 107.400                                                                                    |
| $\beta$ (deg)                                                                     | 90.586                                                                                     |
| $\gamma$ (deg)                                                                    | 106.080                                                                                    |
| <i>V</i> (Å <sup>3</sup> )                                                        | 1833.9(3)                                                                                  |
| <i>Z</i>                                                                          | 2                                                                                          |
| <i>D</i> <sub>calcd</sub> (g/cm <sup>3</sup> )                                    | 1.480                                                                                      |
| $\mu$ (mm <sup>-1</sup> )                                                         | 1.365                                                                                      |
| $\lambda$ (Å)                                                                     | 0.71073                                                                                    |
| GOF on <i>F</i> <sup>2</sup>                                                      | 1.043                                                                                      |
| Final <i>R</i><br>indices<br>[ <i>I</i> > 2 $\sigma$ ( <i>I</i> )] <sup>a,b</sup> | <i>R</i> 1 = 0.0273<br><i>wR</i> 2 = 0.0747                                                |

$${}^a R1 = \frac{\sum ||F_o| - |F_c||}{\sum |F_o|}, {}^b wR2 = [\frac{\sum w(F_o^2 - F_c^2)^2}{\sum w(F_o^2)^2}]^{1/2}$$

**Table S2.** Selected bond lengths and bond angles in **1**

| <b>Bond length (Å)</b> |            |
|------------------------|------------|
| Zn(1)-O(1)             | 1.9337(16) |
| Zn(1)-N(1)             | 2.0088(16) |
| Zn(1)-O(6)a            | 1.9722(14) |
| Zn(1)-O(8)b            | 1.9666(15) |
| Zn(2)-O(3)             | 1.9375(15) |
| Zn(2)-O(5)             | 1.9672(15) |
| Zn(2)-N(2)             | 2.0053(16) |
| Zn(2)-O(7)c            | 1.9783(14) |
| <b>Bond angle (°)</b>  |            |
| O(1)-Zn(1)-N(1)        | 123.64(7)  |
| O(1)-Zn(1)-O(6)a       | 105.12(6)  |
| O(1)-Zn(1)-O(8)b       | 111.77(6)  |
| O(6)a-Zn(1)-N(1)       | 101.03(7)  |
| O(8)b-Zn(1)-N(1)       | 101.34(7)  |
| O(6)a-Zn(1)-O(8)b      | 113.83(6)  |
| O(3)-Zn(2)-O(5)        | 111.00(6)  |
| O(3)-Zn(2)-N(2)        | 126.55(6)  |
| O(3)-Zn(2)-O(7)c       | 105.23(6)  |
| O(5)-Zn(2)-N(2)        | 102.16(6)  |
| O(5)-Zn(2)-O(7)c       | 112.47(6)  |
| O(7)c-Zn(2)-N(2)       | 98.89(6)   |

Symmetric transformation: a = x, 1+y, z; b = 1+x, 1+y, z; c = 1+x, y, z

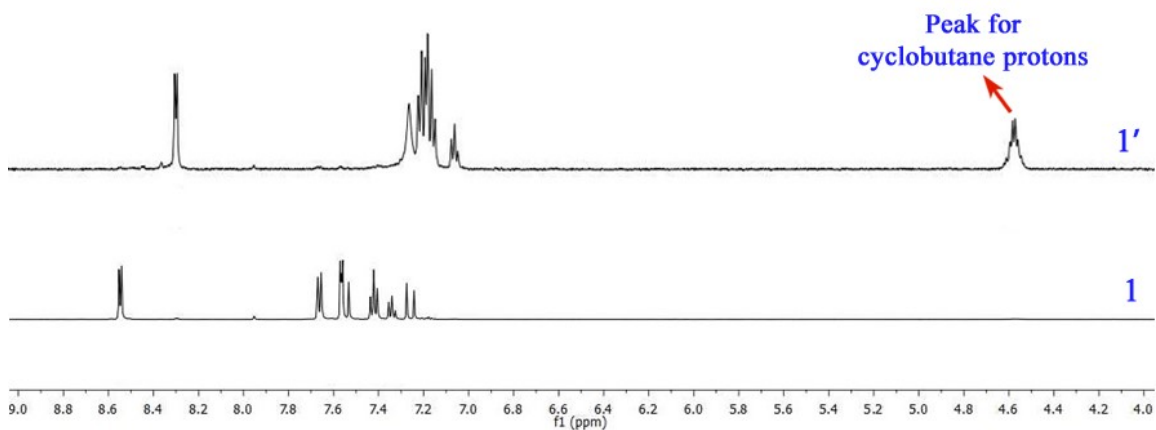

**Fig. S1** Partial <sup>1</sup>H NMR spectra (400 MHz, DMSO-d<sub>6</sub>) of compounds **1** and **1'**.

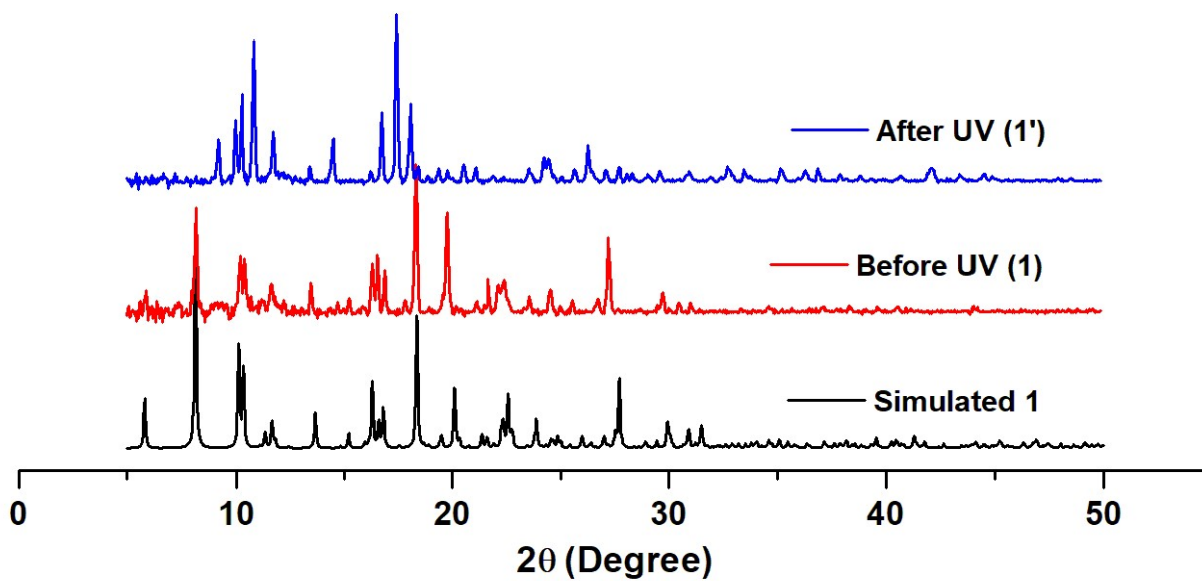

**Fig. S2** PXRD patterns of simulated **1** (black), before (red) and after UV irradiation (blue).

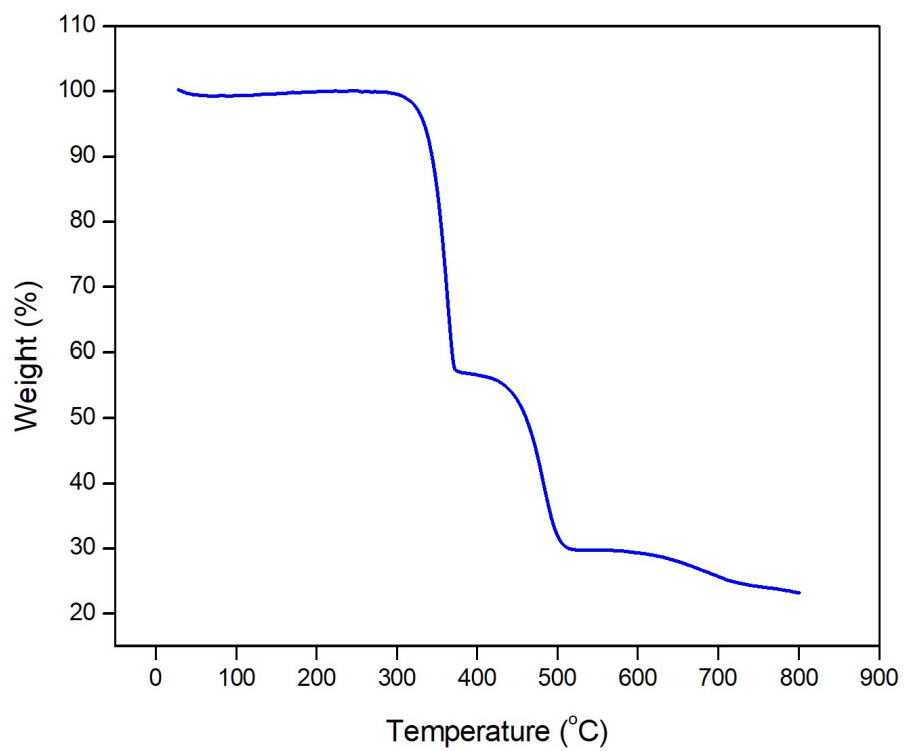

**Fig. S3** TGA plot of compound 1.

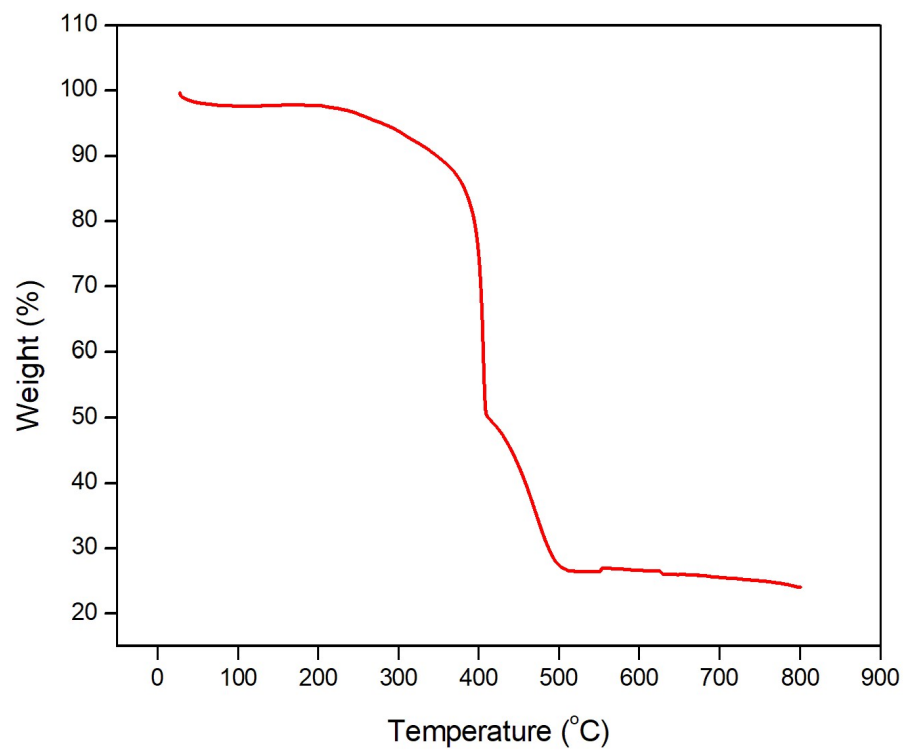

**Fig. S4** TGA of compound 1'.

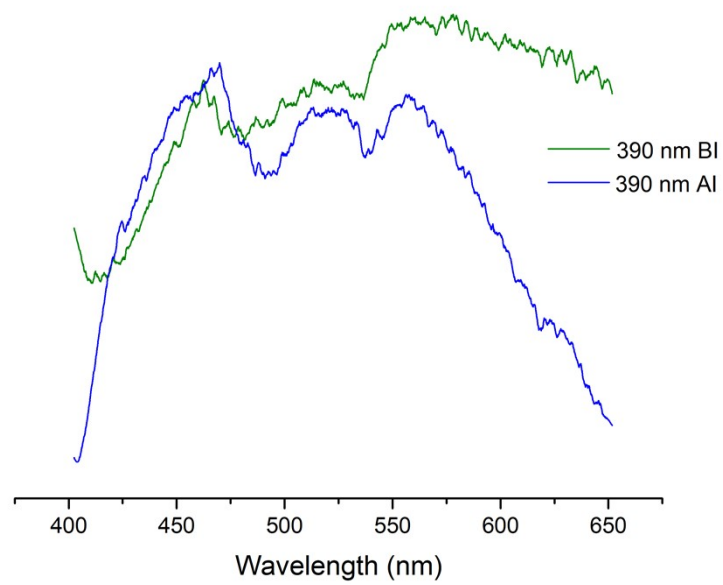

**Fig. S5** Solid-state photoluminescence spectra of **1** and **1'**.
